# Supplementary material for: Biomarker evidence for the occurrence of anaerobic ammonium oxidation in the eastern Mediterranean Sea during Quaternary and Pliocene sapropel formation
Source: Copernicus journal article supplement (doi:10.5194/bg-2019-27), 2019-02-06
Supplement: Supplementary file 1 [file bg-2019-27-supplement.pdf]

Sup Fig 1.

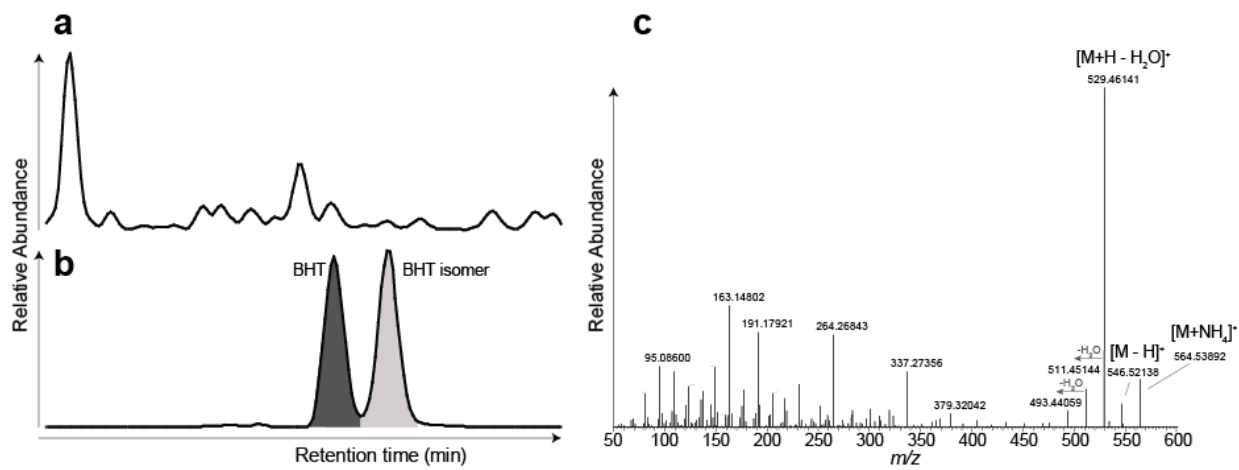

Supplemental Figure 1. Base peak chromatogram (a) and combined extracted ion currents (within 3 ppm) of protonated, ammoniated, and sodiated adducts ( $m/z$  547.47209 + 564.49864 + 569.45403, respectively) (b) of non-derivatised BHT and BHT isomer in sediment from 64PE406-E1 core depth 46 – 47 cm. (c) Combined orbitrap HRMS<sub>2</sub> of 6 scan events over the ammoniated adduct ([M+NH<sub>4</sub>]<sup>+</sup>;  $m/z$  564.49864) of BHT isomer.
